# Supplementary material for: Lapatinib plus Capecitabine for HER2-Positive Advanced Breast Cancer
Source: Atypon-hosted journal article supplement (doi:10.1056/nejmoa064320), 2006-12-27
Supplement: nejm_geyer_2733sa1.pdf [file nejm_geyer_2733sa1.pdf]

## Supplementary Appendix

This appendix has been provided by the authors to give readers additional information about their work.

Supplement to: Geyer CE, Forster J, Lindquist D, et al. Lapatinib plus capecitabine for HER2-positive advanced breast cancer. N Engl J Med 2006;355:2733-43.

## Geyer Web Only Supplement 06-4320

Supplementary Table 1. Prohibited Medications Due to Inhibition or Induction of CYP3A4 by Lapatinib

| Drug Class                | Agent                                                                                                                   | Wash-out |
|---------------------------|-------------------------------------------------------------------------------------------------------------------------|----------|
| <b>CYP3A4 Inducers</b>    |                                                                                                                         |          |
| Antibiotics               | All rifamycin class agents (eg, rifampicin, rifabutin, rifapentine)                                                     | 14 days  |
| Anticonvulsants           | Phenytoin, carbamazepine, barbiturates (eg, phenobarbital)                                                              |          |
| Antiretrovirals           | Efavirenz, nevirapine                                                                                                   |          |
| Glucocorticoids (oral)    | Cortisone (> 50 mg), hydrocortisone (> 40 mg), prednisone (>10 mg), methylprednisolone (>8 mg), dexamethasone (>1.5 mg) |          |
| Other                     | St. John's Wort, modafinil                                                                                              |          |
| <b>CYP3A4 Inhibitors</b>  |                                                                                                                         |          |
| Antibiotics               | Clarithromycin, erythromycin, troleandomycin                                                                            | 7 days   |
| Antifungals               | Itraconazole, ketoconazole, fluconazole (>150 mg daily), voriconazole                                                   |          |
| Antiretrovirals, protease | Delaviridine, nelfinavir, amprenavir, ritonavir,                                                                        |          |

|                          |                                                                  |                                |
|--------------------------|------------------------------------------------------------------|--------------------------------|
| inhibitors               | indinavir, saquinavir, lopinivir                                 |                                |
| Calcium channel blockers | Verapamil, diltiazem                                             |                                |
| Antidepressants          | Nefazodone, fluvoxamine                                          |                                |
| GI Agents                | Cimetidine, aprepitant                                           |                                |
| Other                    | Grapefruit, grapefruit juice                                     |                                |
|                          | Amiodarone                                                       | 6 months                       |
| <b>Miscellaneous</b>     |                                                                  |                                |
| Antacids                 | Eg, Calcium carbonate and magnesium hydroxide, calcium carbonate | 1 hour before and after dosing |

Supplementary Table 2. Comparison of Independent Review Committee and Investigator Assessments of Time-to-Progression Events

| <b>Independent time-to-<br/>progression events</b> | <b>Investigator time-to-<br/>progression events</b> |           |
|----------------------------------------------------|-----------------------------------------------------|-----------|
|                                                    | Yes                                                 | No        |
| <b>Both Arms (N=324)</b>                           |                                                     |           |
| Yes                                                | 87 (27%)                                            | 34 (10%)  |
| No                                                 | 46 (14%)                                            | 157 (48%) |
| <b>Lapatinib + Capecitabine<br/>(N=163)</b>        |                                                     |           |

|                             | Yes      | No       |
|-----------------------------|----------|----------|
| Yes                         | 34 (21%) | 15 (9%)  |
| No                          | 25 (15%) | 89 (55%) |
| <b>Capecitabine (N=161)</b> | Yes      | No       |
| Yes                         | 53 (33%) | 19 (12%) |
| No                          | 21 (13%) | 68 (42%) |

### Supplementary Figure Legends

Supplementary Figure 1. Compliance with Timing of Disease Status Assessments. Box plots with median, 25th and 75th percentiles and outliers

Supplementary Figure 2. Mean (95% CI) LVEF at Scheduled Assessments

# Compliance with Disease Status Assessment Times

Time to Assessment D

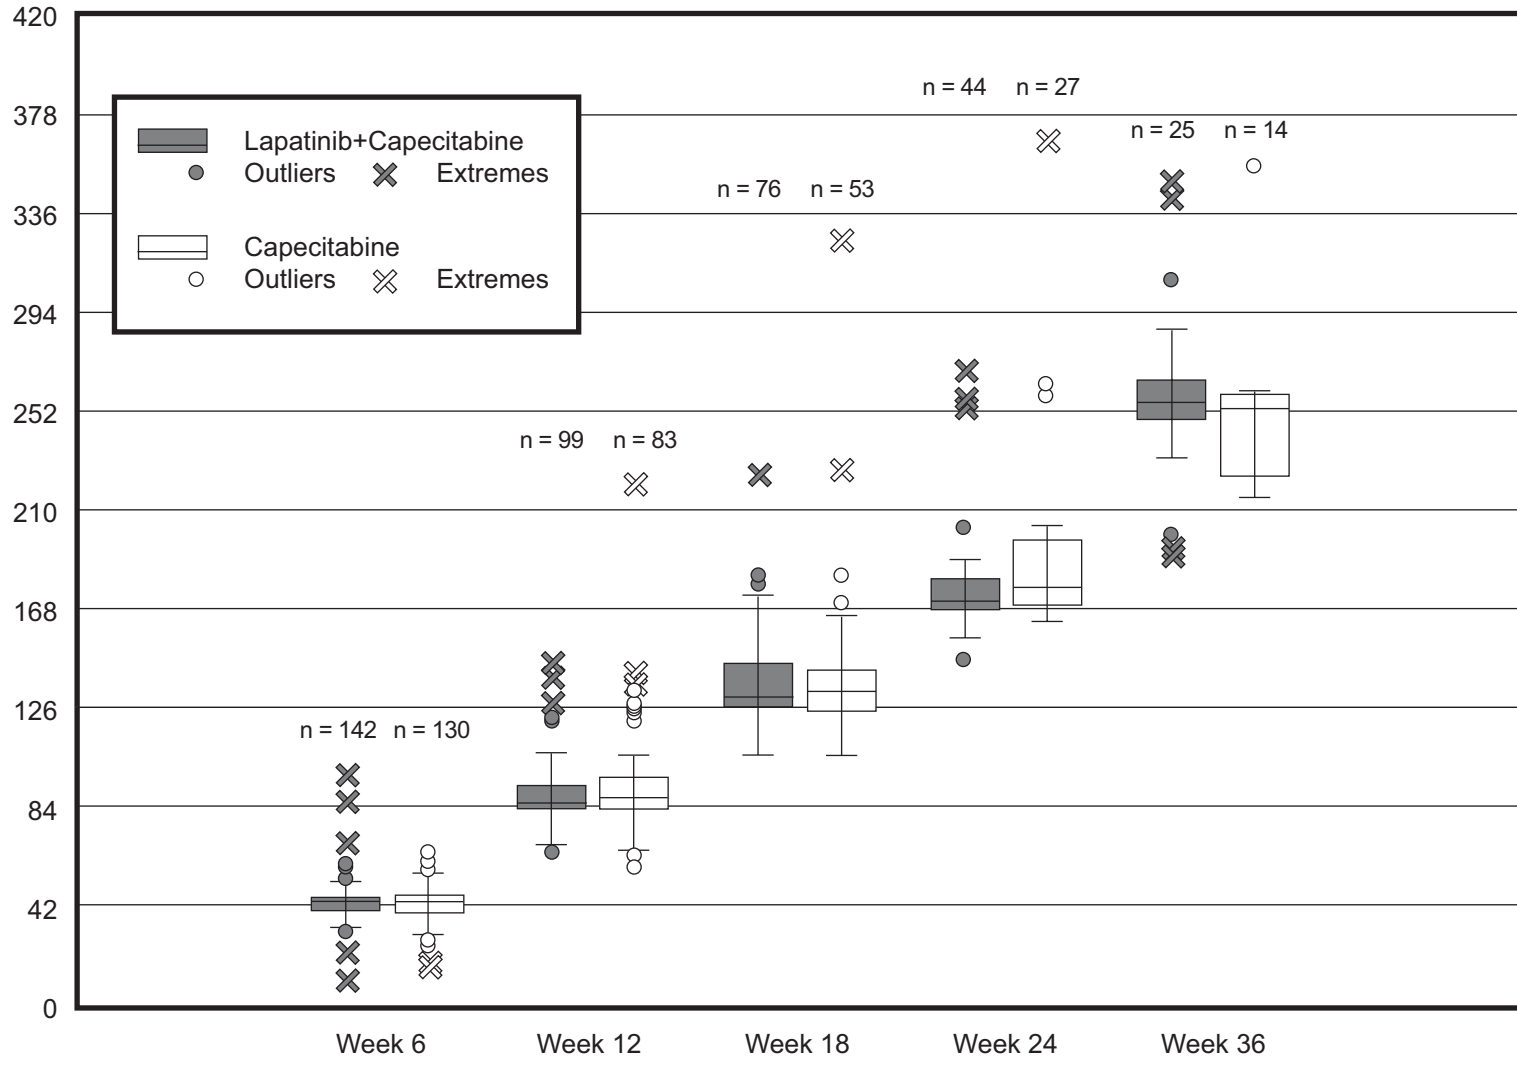

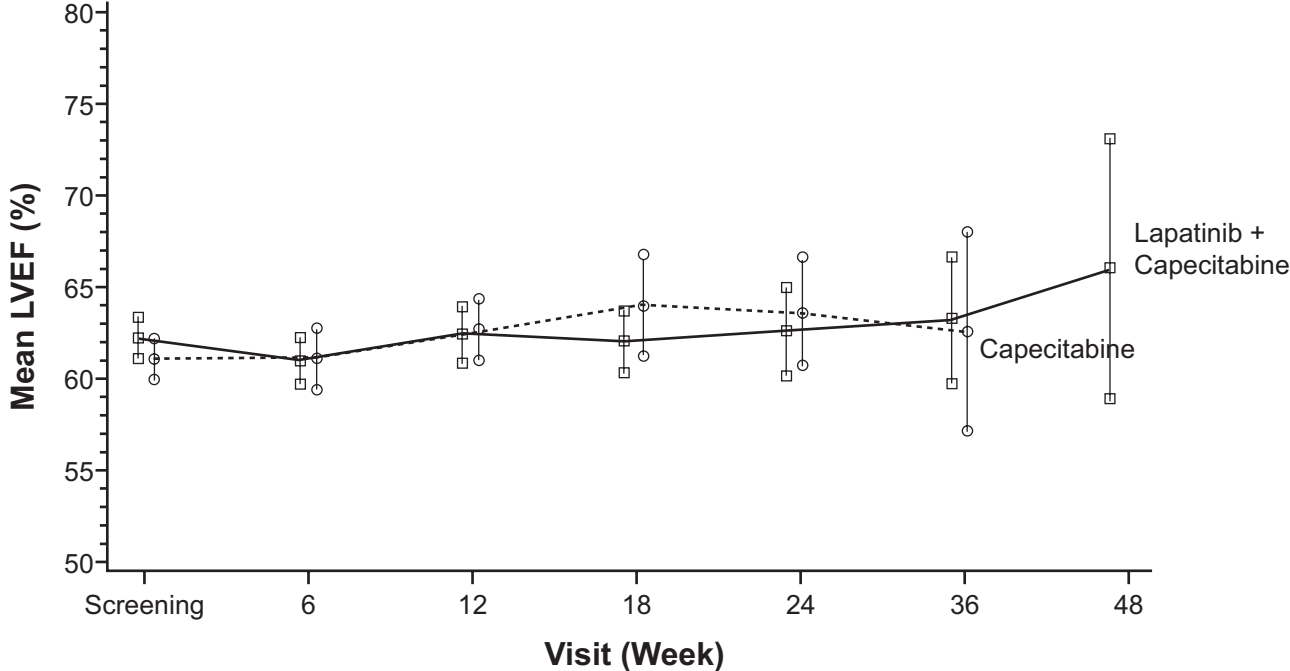

**No. at Risk**

|                |     |     |    |    |    |    |   |
|----------------|-----|-----|----|----|----|----|---|
| Lapatinib+Cape | 162 | 112 | 85 | 65 | 40 | 18 | 8 |
| Capecitabine   | 151 | 88  | 66 | 35 | 23 | 6  | 0 |
